# Supplementary material for: Modulating the Luminescence, Photosensitizing Properties, and Mitochondria-Targeting Ability of D-π-A-Structured Dihydrodibenzo[a,c]phenazines
Source: MDPI journal article supplement (doi:10.3390/molecules28176392), 2023-09-01
Supplement: s1 [file s1]

## Supporting Information

# Modulating the Luminescence, Photosensitizing Properties, and Mitochondria-Targeting Ability of D- $\pi$ -A-Structured Dihydrodibenzo[*a,c*]phenazines

Zhaozhi Zhang <sup>1</sup>, Qijing Wang <sup>1</sup>, Xinyi Zhang <sup>1</sup>, Dong Mei <sup>2,\*</sup> and Ju Mei <sup>1,\*</sup>

1. Key Laboratory for Advanced Materials, Feringa Nobel Prize Scientist Joint Research Center, Frontiers Science Center for Materiobiology and Dynamic Chemistry, Joint International Research Laboratory for Precision Chemistry and Molecular Engineering, Institute of Fine Chemicals, School of Chemistry and Molecular Engineering, East China University of Science & Technology, 130 Meilong Road, Shanghai, 200237, China.
2. Clinical Research Center, Beijing Children's Hospital, Capital Medical University, National Center for Children's Health, Beijing, 100045, China.

\*Correspondence: meidong11290926@126.com (D.M.); daisymeiju@ecust.edu.cn (J.M.)

## Synthesis of the DPAC Derivatives

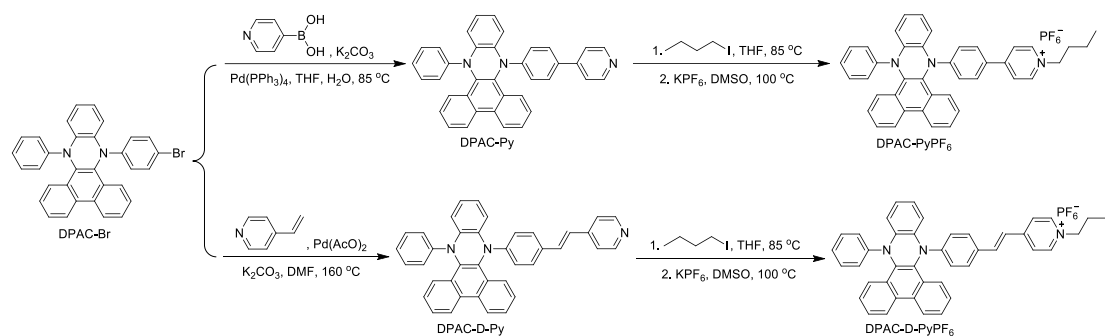

**Scheme S1.** The synthetic routes of DPAC derivatives.

## Structure Characterization of the DPAC Derivatives

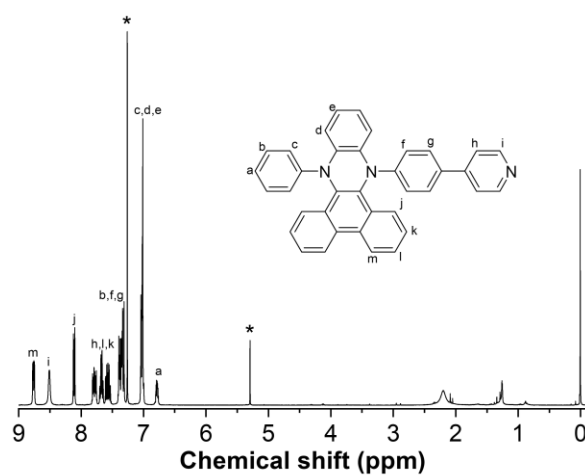

**Figure S1.**  $^1\text{H}$  NMR spectrum of DPAC-Py in  $\text{CDCl}_3$ . The solvent peaks are marked with asterisk.

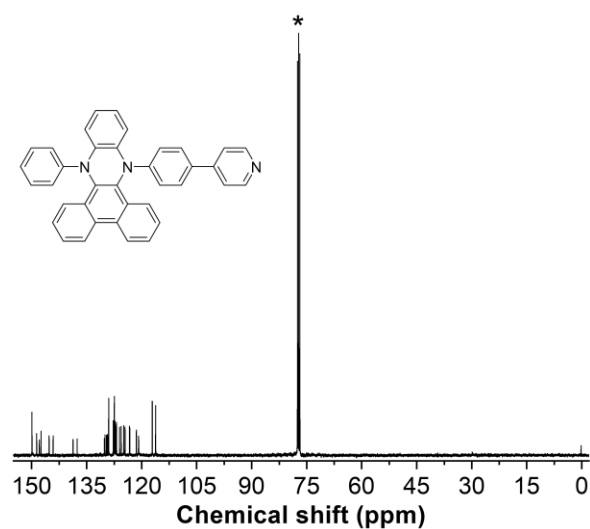

**Figure S2.**  $^{13}\text{C}$  NMR spectrum of DPAC-Py in  $\text{CDCl}_3$ . The solvent peak is marked with asterisk.

#### Single Mass Analysis

Tolerance = 5.0 PPM / DBE: min = -1.5, max = 50.0

Element prediction: Off

Number of isotope peaks used for i-FIT = 2

Monoisotopic Mass, Even Electron Ions

1 formula(e) evaluated with 1 results within limits (up to 50 best isotopic matches for each mass)

Elements Used:

C: 0-37 H: 0-26 N: 0-3

J-MEI

MJ-ZZZ-005 25 (0.267) Cm (25:26)

1: TOF MS ES+  
6.74e+003

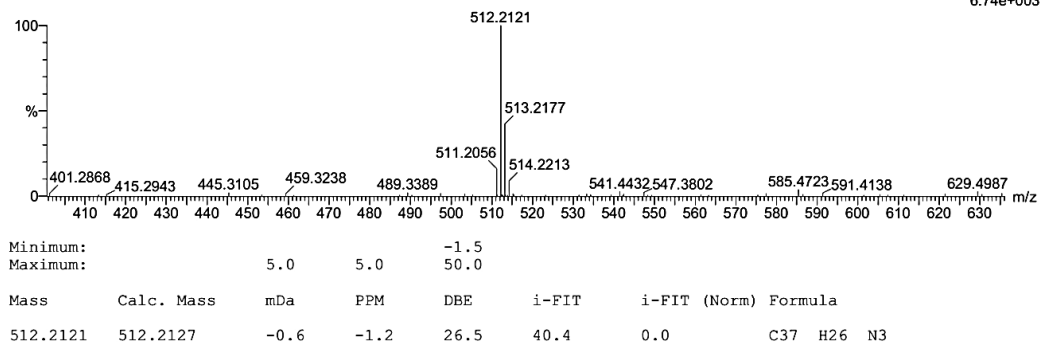

**Figure S3.** HRMS of DPAC-Py.

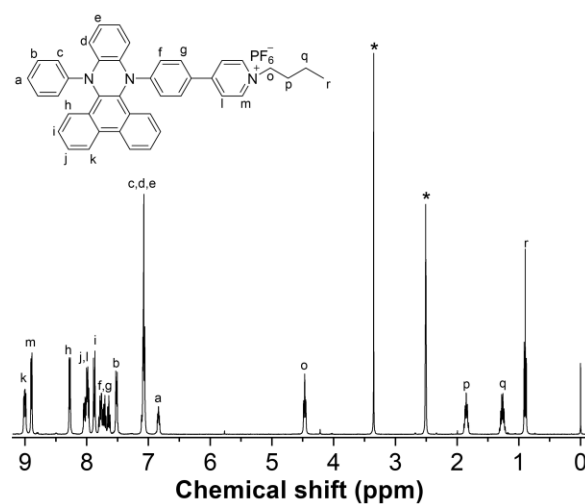

**Figure S4.**  $^1\text{H}$  NMR spectrum of DPAC-PyPF<sub>6</sub> in DMSO- $d_6$ . The solvent peaks are marked with asterisk.

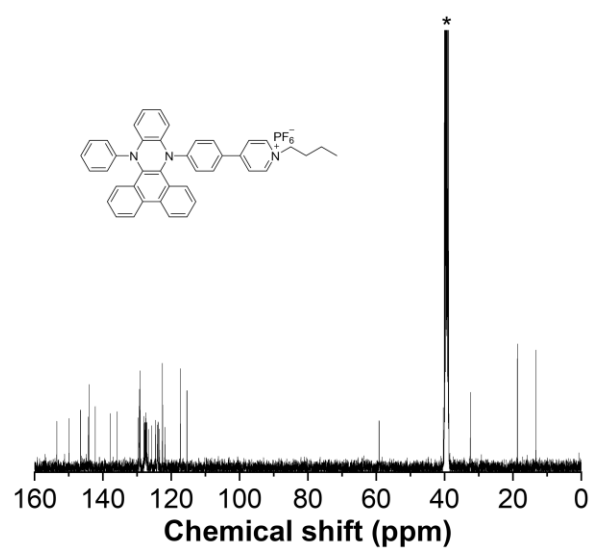

**Figure S5.**  $^{13}\text{C}$  NMR spectrum of DPAC-PyPF<sub>6</sub> in DMSO- $d_6$ . The solvent peaks are marked with asterisk.

### Single Mass Analysis

Tolerance = 20.0 PPM / DBE: min = -1.5, max = 50.0

Element prediction: Off

Number of isotope peaks used for i-FIT = 3

Monoisotopic Mass, Even Electron Ions

1 formula(e) evaluated with 1 results within limits (up to 50 best isotopic matches for each mass)

Elements Used:

C: 0-41 H: 0-34 N: 0-3

J-MEI

MJ-ZZZ-006 43 (0.480) Cm (43:49)

1: TOF MS ES+  
2.57e+004

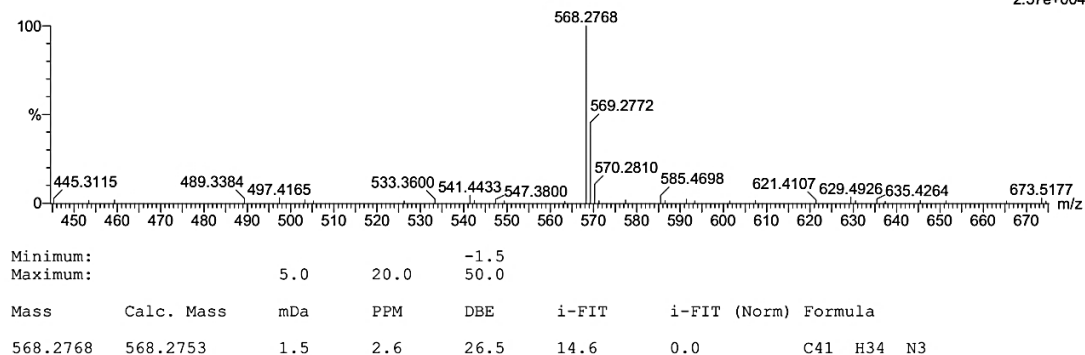

Figure S6. HRMS of DPAC-PyPF<sub>6</sub>.

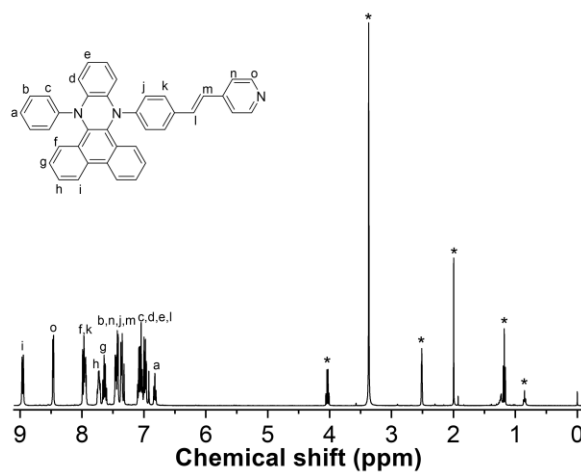

Figure S7. <sup>1</sup>H NMR spectrum of DPAC-D-Py in DMSO-*d*<sub>6</sub>. The solvent peaks are marked with asterisk.

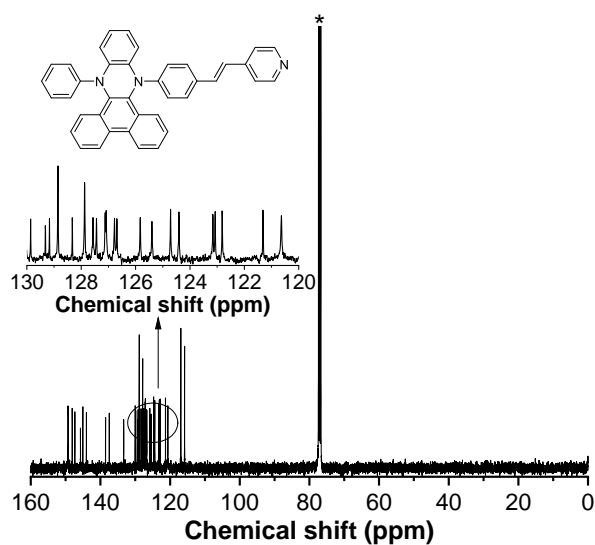

**Figure S8.**  $^{13}\text{C}$  NMR spectrum of DPAC-D-Py in  $\text{CDCl}_3$ . The solvent peaks are marked with asterisk.

MJ-ZZ-053\_20230619195140 #77-85 RT: 0.18-0.19 AV: 9 NL: 9.92E7  
T: FTMS + p NSI Full ms [100.0000-1500.0000]

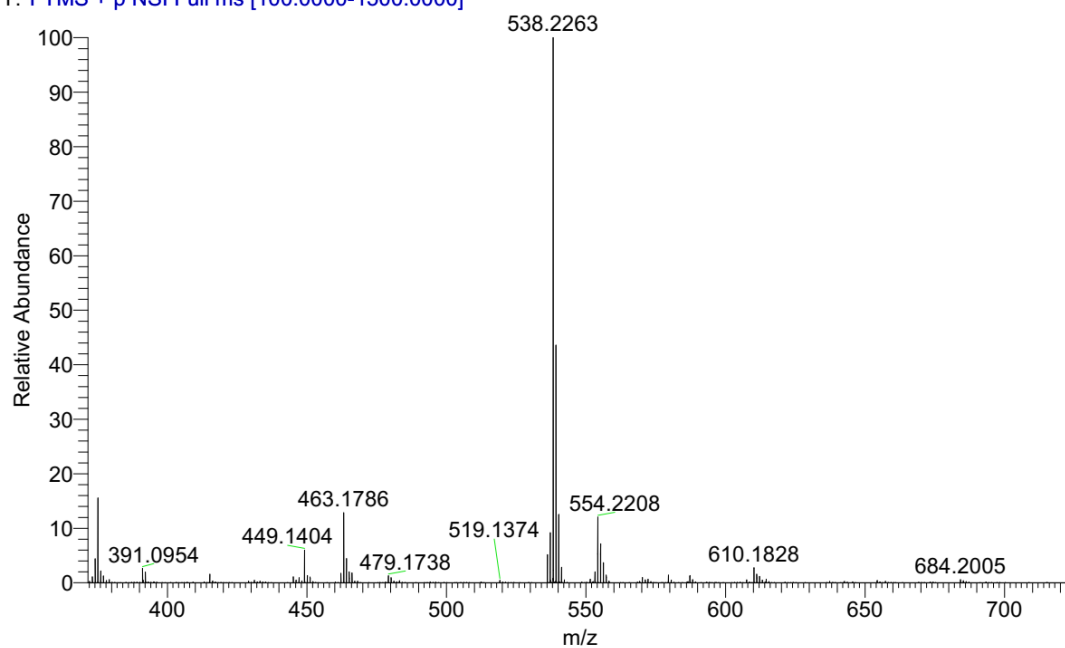

MJ-ZZ-053\_20230619195140 #76-84 RT: 0.17-0.19 AV: 9

T: FTMS + p NSI Full ms [100.0000-1500.0000]

m/z = 536.93-538.75

| m/z      | Intensity   | Relative | Theo. Mass | Delta (ppm) | Composition                            |
|----------|-------------|----------|------------|-------------|----------------------------------------|
| 538.2263 | 106530992.0 | 100.00   | 538.2278   | -1.43       | $\text{C}_{39}\text{H}_{28}\text{N}_3$ |

**Figure S9.** HRMS of DPAC-D-Py.

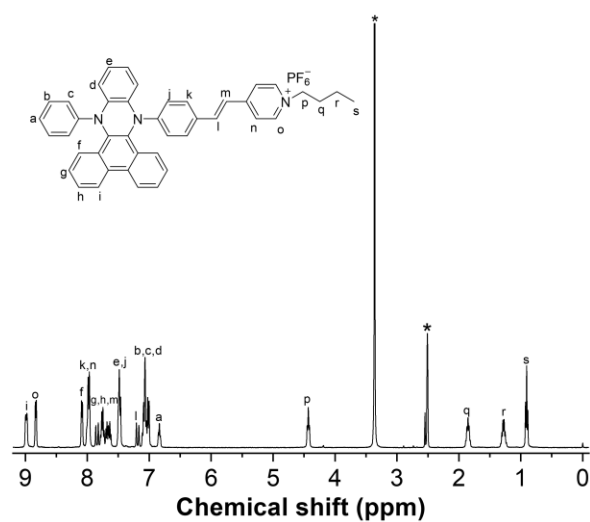

**Figure S10.**  $^1\text{H}$  NMR spectrum of DPAC-D-PyPF<sub>6</sub> in DMSO-*d*<sub>6</sub>. The solvent peaks are marked with asterisk.

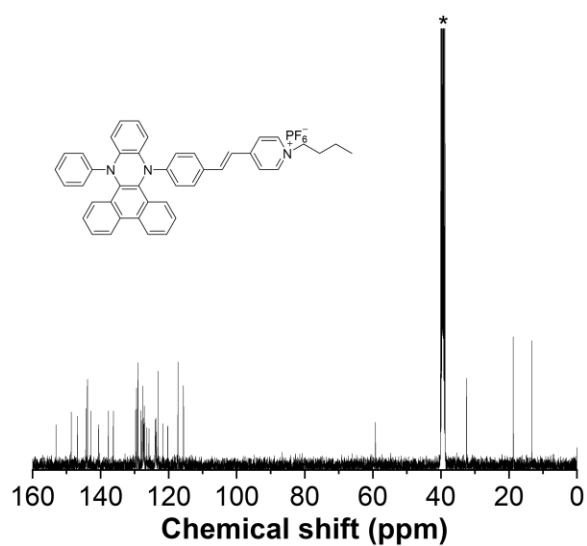

**Figure S11.**  $^{13}\text{C}$  NMR spectrum of DPAC-D-PyPF<sub>6</sub> in DMSO-*d*<sub>6</sub>. The solvent peaks are marked with asterisk.

MJ-ZZZ-014

XEVO-G2TOF#NotSet

28-Jun-202113:47:39

20212261 214 (2.122) Cm (214-(614:615+621:622))

1: TOF MS ES+  
4.78e5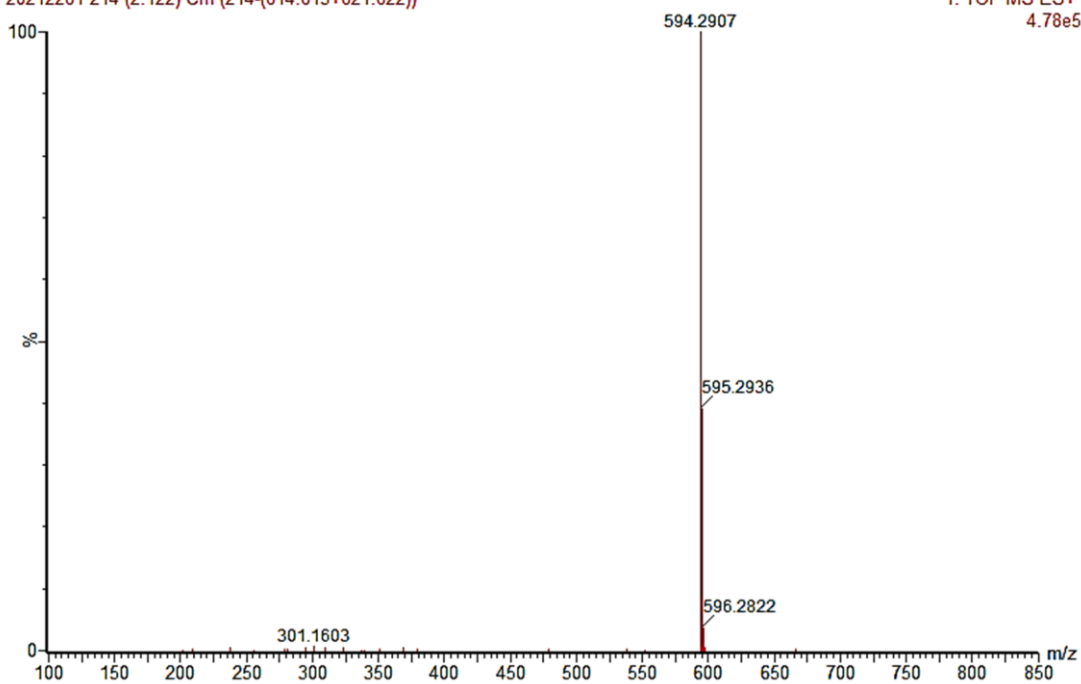

|          |            |      |      |      |       |              |            |
|----------|------------|------|------|------|-------|--------------|------------|
| Minimum  |            |      |      | -1.5 |       |              |            |
| Maximum  | 20.0       | 5.0  | 50.0 |      |       |              |            |
| Mass     | Calc. Mass | mDa  | PPM  | DBE  | i-FIT | i-FIT (Norm) | Formula    |
| 594.2907 | 594.2909   | -0.2 | -0.3 | 27.5 | 142.3 | 2.303        | C43 H36 N3 |

**Figure S12.** HRMS of DPAC-D-PyPF<sub>6</sub>.

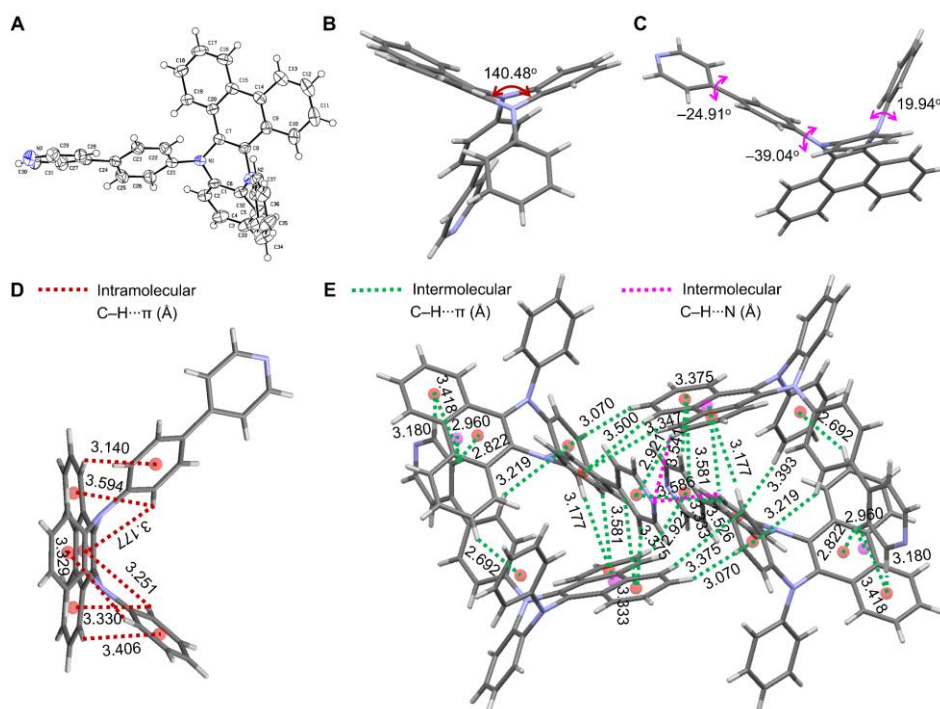

**Figure S13.** The (A) ORTEP drawings, (B) dihedral angles, (C) torsion angles, (D) intramolecular C-H... $\pi$  interactions and (E) intermolecular C-H... $\pi$  and C-H...N interactions of DPAC-Py.

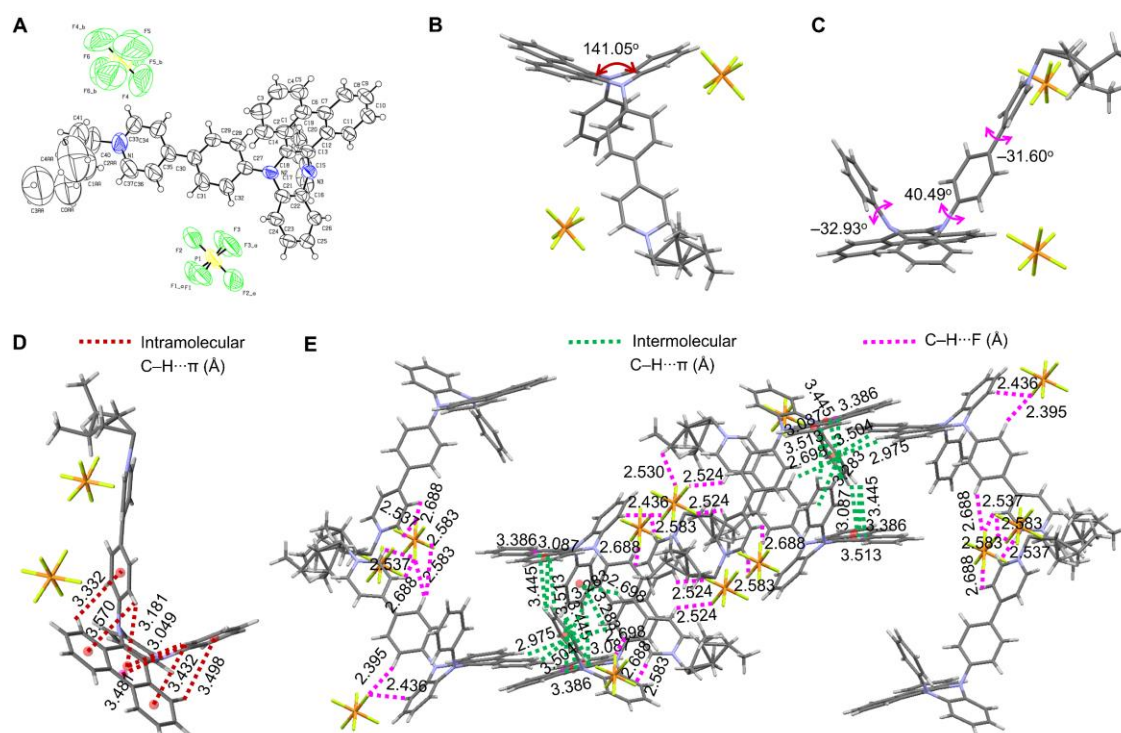

**Figure S14.** The (A) ORTEP drawings, (B) dihedral angles, (C) torsion angles, (D) intramolecular C-H... $\pi$  interactions, and (E) intermolecular C-H... $\pi$  interactions and C-H...F interactions of DPAC-PyPF<sub>6</sub>.



**Table S1.** Crystal data and details of collection and refinement for the DPAC derivatives.

|                                             | DPAC-Py                                        | DPAC-PyPF <sub>6</sub>                                         |
|---------------------------------------------|------------------------------------------------|----------------------------------------------------------------|
| CCDC number                                 | 2285517                                        | 2285518                                                        |
| Empirical formula                           | C <sub>37</sub> H <sub>25</sub> N <sub>3</sub> | C <sub>41</sub> H <sub>32</sub> N <sub>3</sub> PF <sub>6</sub> |
| Formula weight                              | 511.60                                         | 711.66                                                         |
| Temperature (K)                             | 193(2)                                         | 173(2)                                                         |
| Crystal system                              | Monoclinic                                     | Monoclinic                                                     |
| Space group                                 | P 21/n                                         | C 2/c                                                          |
| Cell parameters                             | $a = 15.7882(6) \text{ \AA}$                   | $a = 15.9162(4) \text{ \AA}$                                   |
|                                             | $b = 10.2161(4) \text{ \AA}$                   | $b = 44.9256(9) \text{ \AA}$                                   |
|                                             | $c = 16.7011(6) \text{ \AA}$                   | $c = 11.6426(3) \text{ \AA}$                                   |
|                                             | $\alpha = 90^\circ$                            | $\alpha = 90^\circ$                                            |
|                                             | $\beta = 104.8310(10)^\circ$                   | $\beta = 105.056(1)^\circ$                                     |
|                                             | $\gamma = 90^\circ$                            | $\gamma = 90^\circ$                                            |
| Volume [ $\text{\AA}^3$ ]                   | 2604.04(17)                                    | 8039.2(3)                                                      |
| <i>Z</i>                                    | 4                                              | 8                                                              |
| $D_{\text{calcd}} [\text{mg/m}^3]$          | 1.305                                          | 1.176                                                          |
| <i>F</i> (000)                              | 1072                                           | 2944                                                           |
| $\theta$ range [ $^\circ$ ]                 | 2.359–25.995                                   | 3.936–68.421                                                   |
| Index ranges                                | $-19 \leq h \leq 19$                           | $-19 \leq h \leq 19$                                           |
|                                             | $-12 \leq k \leq 12$                           | $-53 \leq k \leq 54$                                           |
|                                             | $-20 \leq l \leq 20$                           | $-14 \leq l \leq 14$                                           |
| <i>R</i> 1 (all data)                       | 0.0749                                         | 0.1459                                                         |
| <i>wR</i> 2 (all data)                      | 0.1417                                         | 0.4441                                                         |
| <i>R</i> <sub>1</sub> [ $I > 2\sigma(I)$ ]  | 0.0500                                         | 0.1303                                                         |
| <i>wR</i> <sub>1</sub> [ $I > 2\sigma(I)$ ] | 0.1220                                         | 0.4160                                                         |
| GOF                                         | 1.048                                          | 1.951                                                          |
| <i>R</i> (int)                              | 0.0863                                         | 0.0511                                                         |
| No. of reflections collects                 | 26600                                          | 70903                                                          |
| No. of reflections                          | 5115                                           | 7351                                                           |

## Photophysical Properties of the DPAC Derivatives

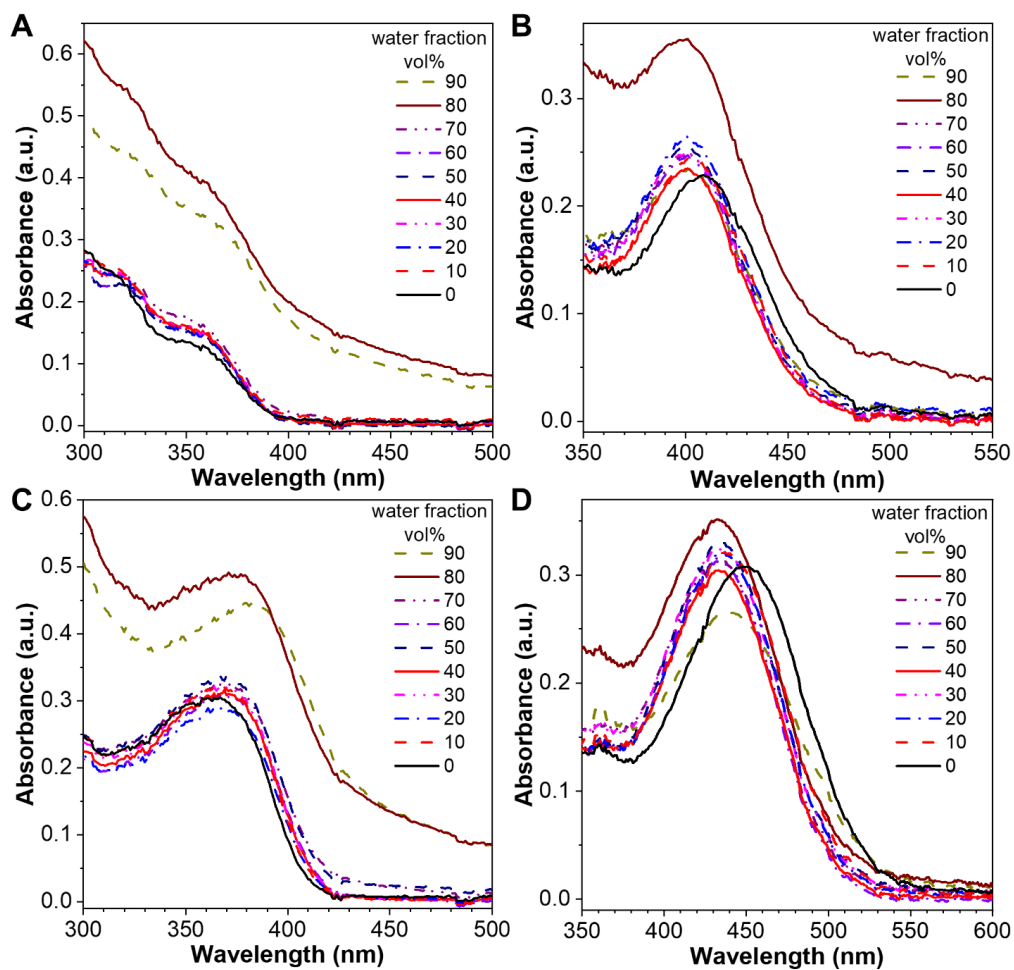

**Figure S15.** The UV-Vis spectra of (A) DPAC-Py, (B) DPAC-PyPF<sub>6</sub>, (C) DPAC-D-Py and (D) DPAC-D-PyPF<sub>6</sub> in the THF/water mixtures with different water fractions ( $f_w$ s) at room temperature,  $c = 10 \mu\text{M}$ .

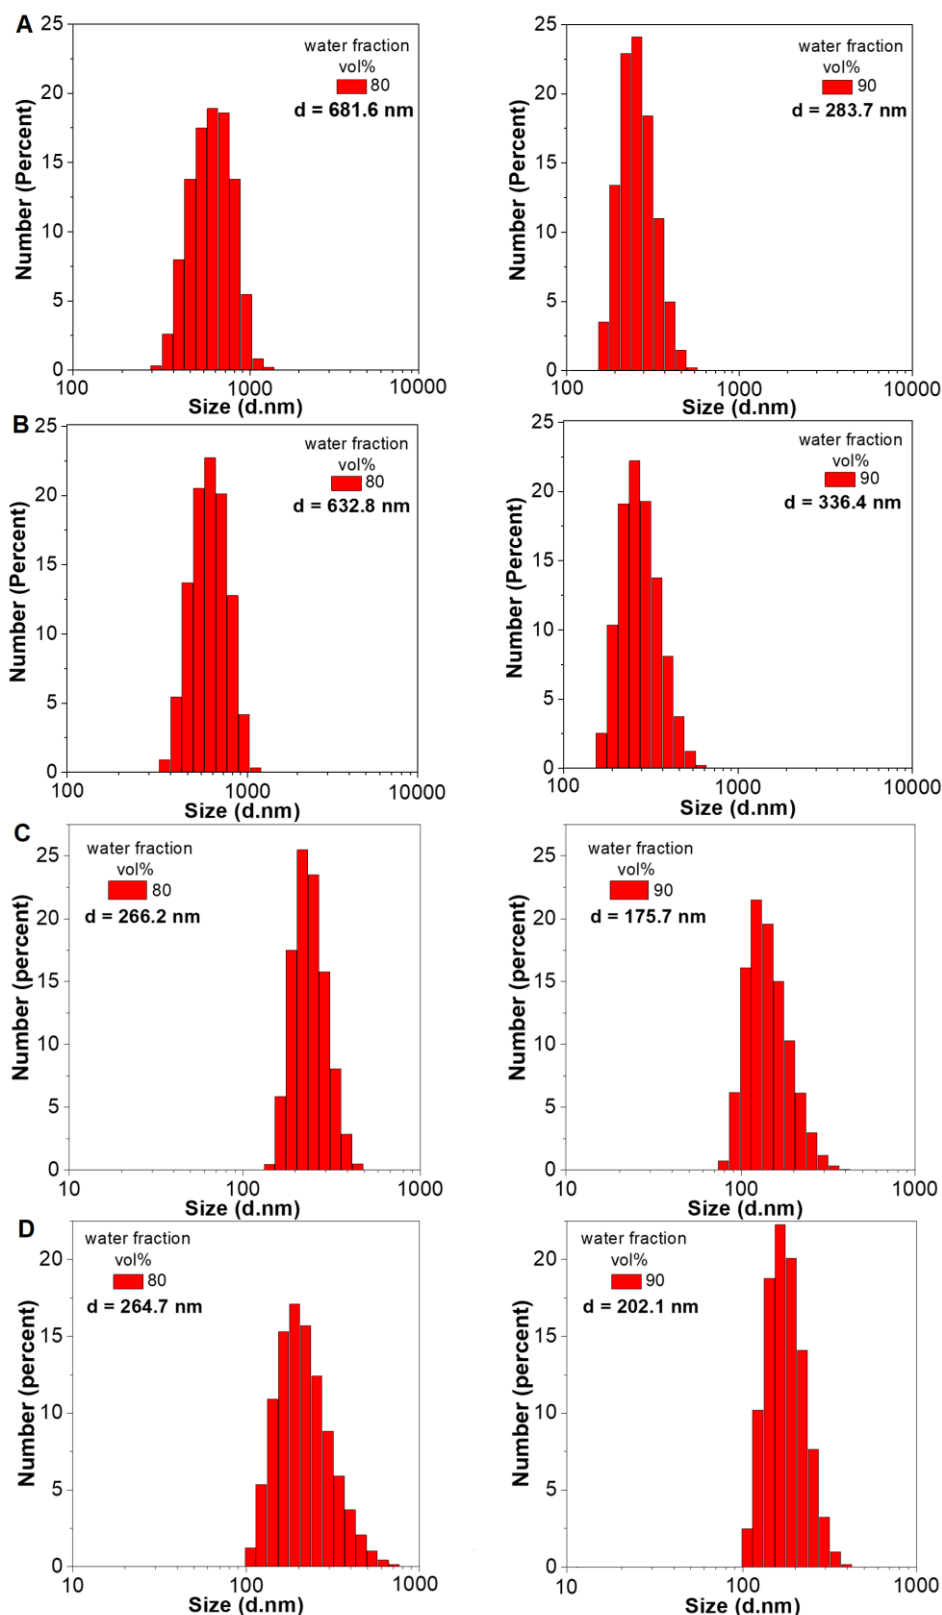

**Figure S16.** The DLS results of (A) DPAC-Py, (B) DPAC-PyPF<sub>6</sub>, (C) DPAC-D-Py and (D) DPAC-D-PyPF<sub>6</sub> in the THF/water mixtures with different  $f_w$ s at room temperature,  $c = 10 \mu\text{M}$ . Note: The valid DLS data of these four DPAC derivatives in the THF/water mixtures with  $f_w$  lower than 70% can hardly be obtained.

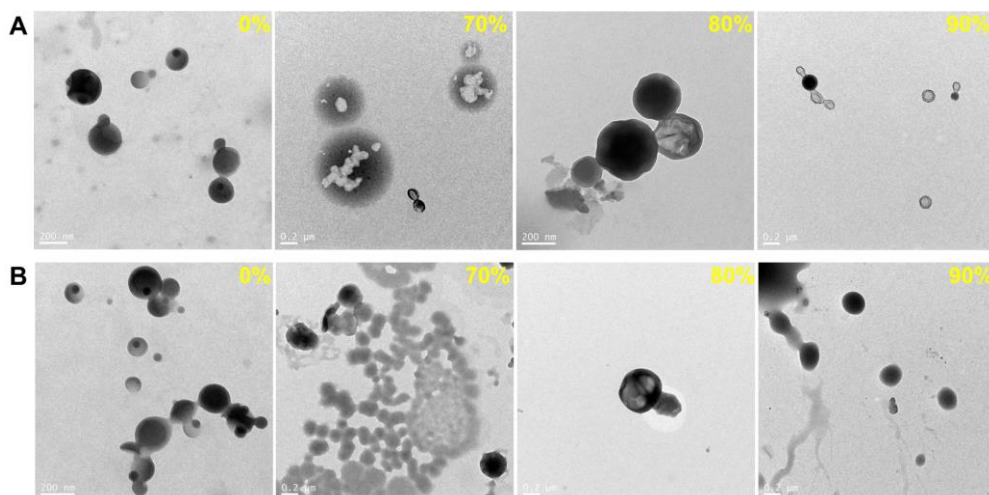

**Figure S17.** The TEM results of (A) DPAC-Py and (B) DPAC-PyPF<sub>6</sub> in the THF/water mixtures with different water fractions at room temperature,  $c = 10 \mu\text{M}$ . Scale bar: 200 nm.

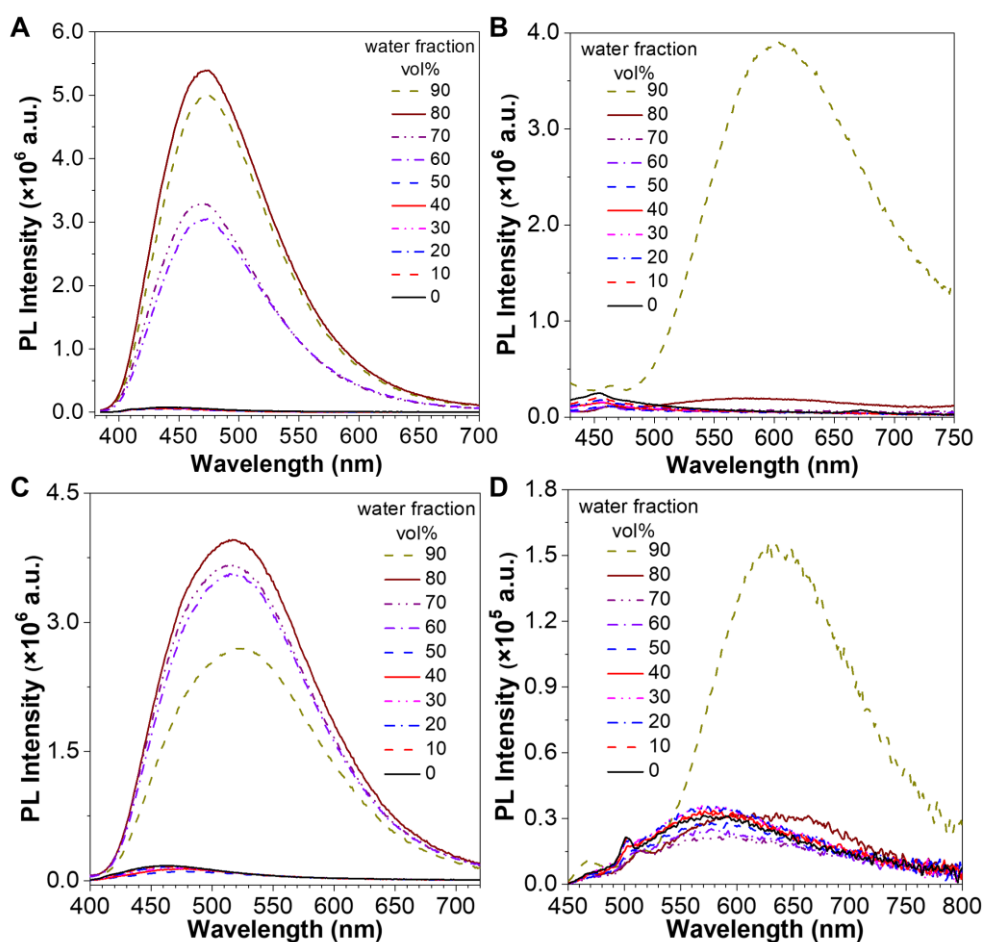

**Figure S18.** The fluorescence spectra of (A) DPAC-Py, (B) DPAC-PyPF<sub>6</sub>, (C) DPAC-D-Py and (D) DPAC-D-PyPF<sub>6</sub> in the DMSO/water mixtures with different  $f_{\text{ws}}$  at room temperature,  $c = 10 \mu\text{M}$ ,  $\lambda_{\text{ex,A}} = 365 \text{ nm}$ ,  $\lambda_{\text{ex,B}} = 401 \text{ nm}$ ,  $\lambda_{\text{ex,C}} = 372 \text{ nm}$ ,  $\lambda_{\text{ex,D}} = 438 \text{ nm}$ .

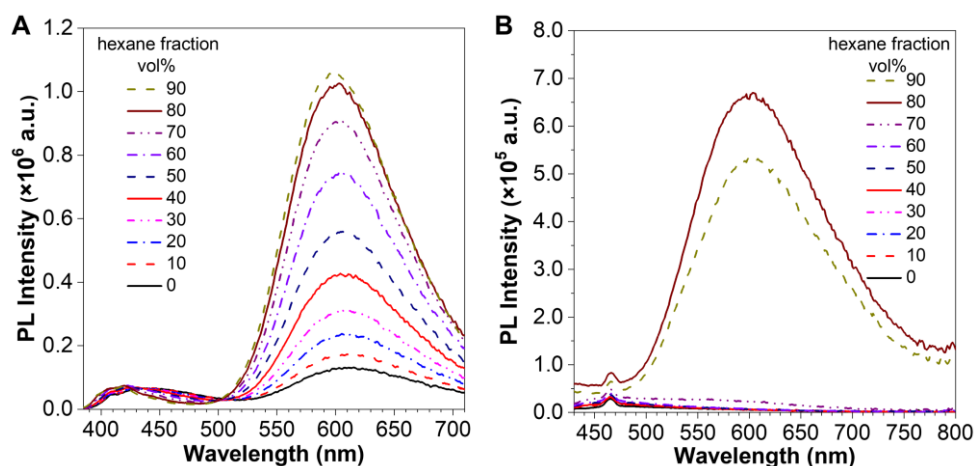

**Figure S19.** The FL spectra of (A) DPAC-Py and (B) DPAC-PyPF<sub>6</sub> in the THF/hexane mixtures with different hexane fractions ( $f_{hs}$ ) at room temperature,  $c = 10 \mu\text{M}$ ,  $\lambda_{ex,A} = 365 \text{ nm}$ ,  $\lambda_{ex,B} = 409 \text{ nm}$ .

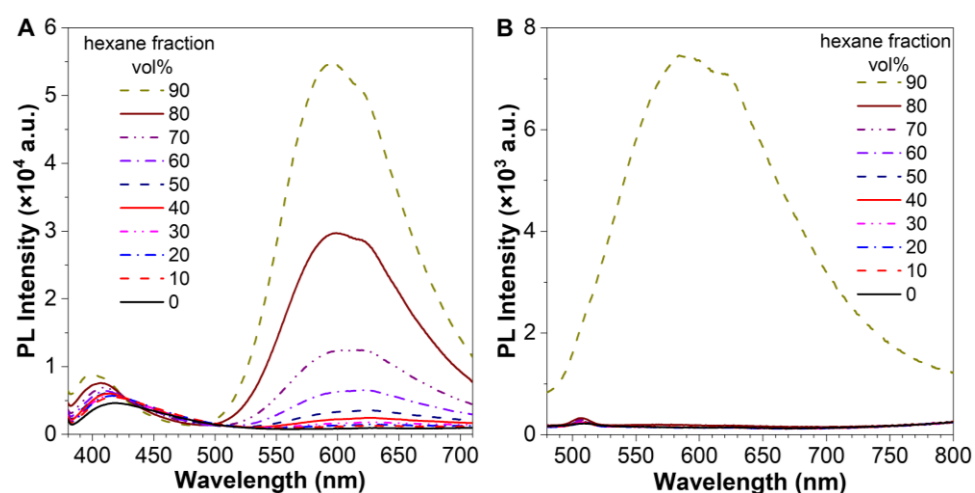

**Figure S20.** The FL spectra of (A) DPAC-Py and (B) DPAC-PyPF<sub>6</sub> in the DCM/hexane mixtures with different hexane fractions ( $f_{hs}$ ) at room temperature,  $c = 10 \mu\text{M}$ ,  $\lambda_{ex,A} = 365 \text{ nm}$ ,  $\lambda_{ex,B} = 440 \text{ nm}$ .

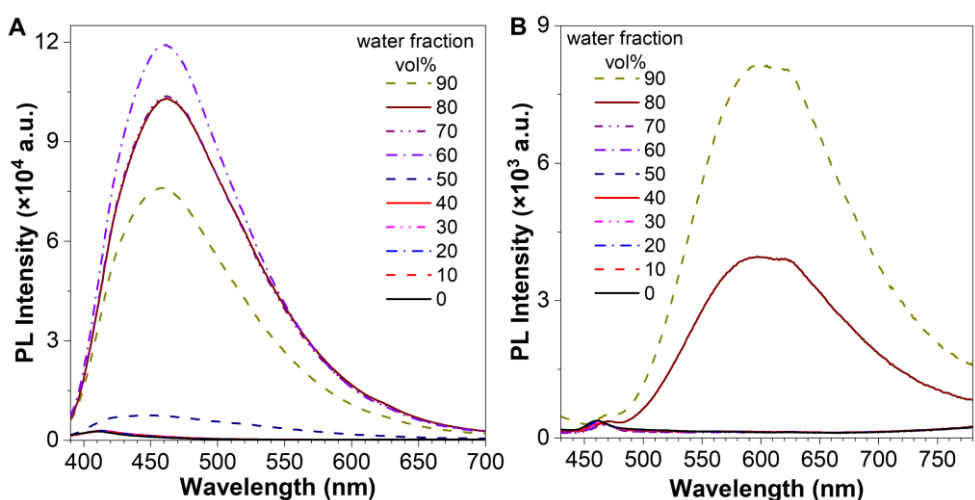

**Figure S21.** The FL spectra of (A) DPAC-Py and (B) DPAC-PyPF<sub>6</sub> in the MeOH/water mixtures with different water fractions ( $f_{ws}$ ) at room temperature,  $c = 10 \mu\text{M}$ ,  $\lambda_{ex,A} = 365 \text{ nm}$ ,  $\lambda_{ex,B} = 401 \text{ nm}$ .

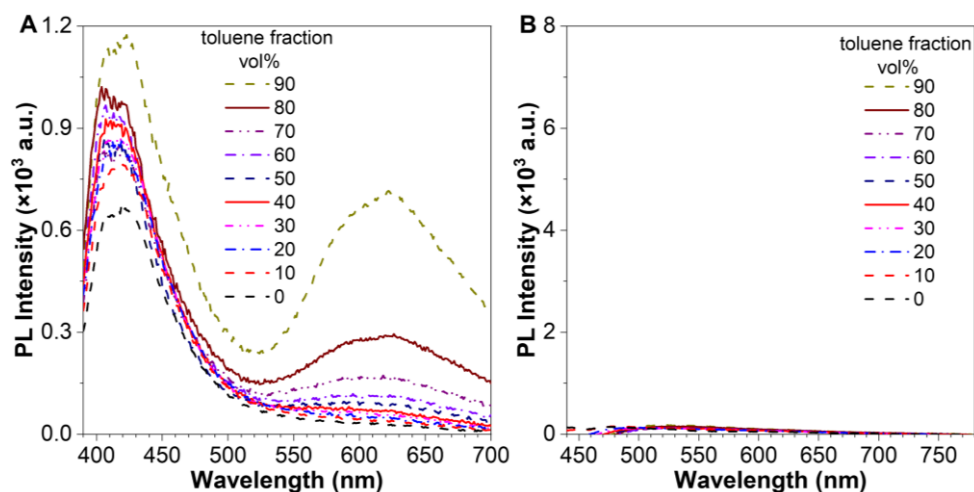

**Figure S22.** The FL spectra of (A) DPAC-Py and (B) DPAC-PyPF<sub>6</sub> in the MeOH/toluene mixtures with different toluene fractions ( $f_{TS}$ ) at room temperature,  $c = 10 \mu\text{M}$ ,  $\lambda_{\text{ex,A}} = 365 \text{ nm}$ ,  $\lambda_{\text{ex,B}} = 401 \text{ nm}$ .

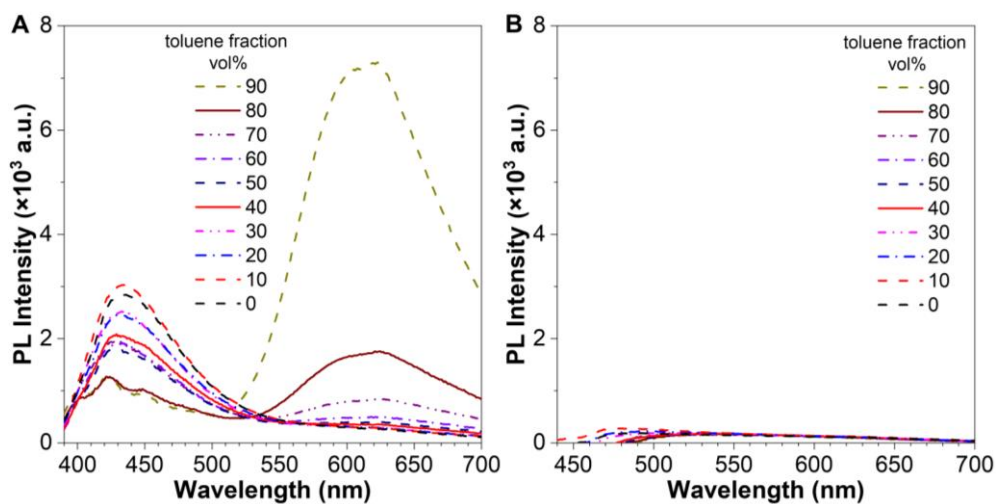

**Figure S23.** The FL spectra of (A) DPAC-Py and (B) DPAC-PyPF<sub>6</sub> in the DMSO/toluene mixtures with different toluene fractions ( $f_{TS}$ ) at room temperature,  $c = 10 \mu\text{M}$ ,  $\lambda_{\text{ex,A}} = 365 \text{ nm}$ ,  $\lambda_{\text{ex,B}} = 401 \text{ nm}$ .

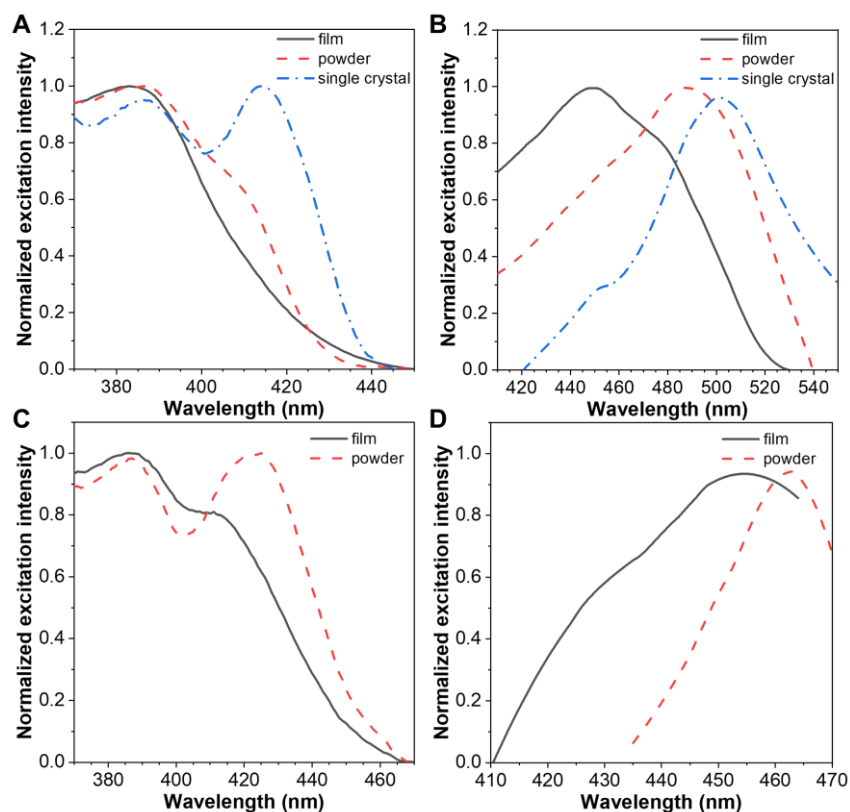

**Figure S24.** The normalized solid-state excitation spectra of (A) DPAC-Py, (B) DPAC-PyPF<sub>6</sub>, (C) DPAC-D-Py and (D) DPAC-D-PyPF<sub>6</sub>.

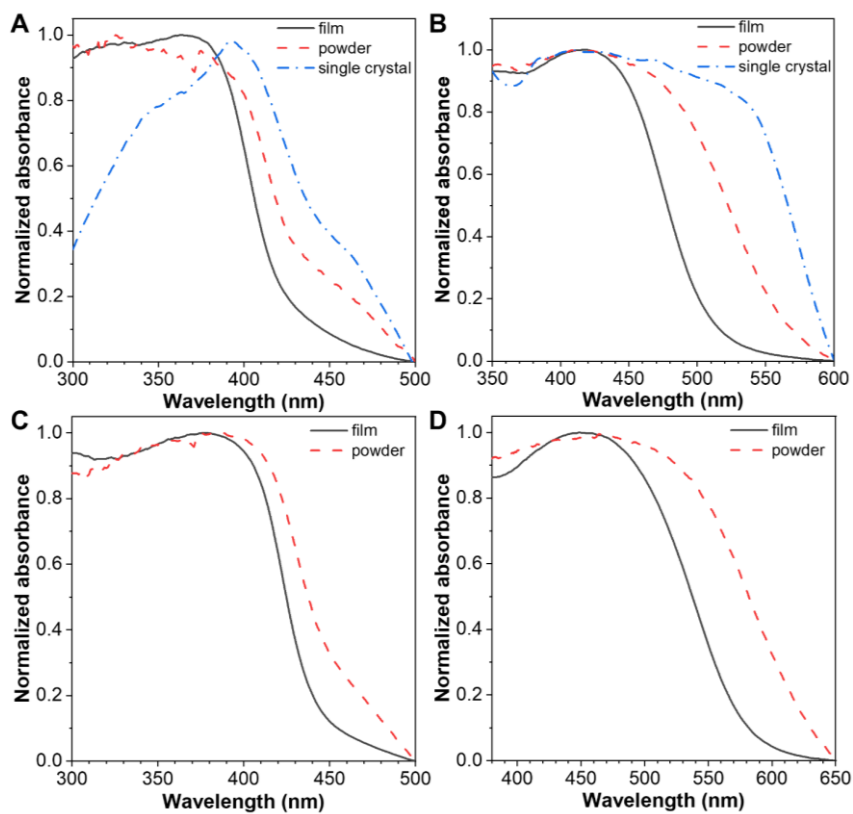

**Figure S25.** The normalized solid-state absorbance spectra of (A) DPAC-Py, (B) DPAC-PyPF<sub>6</sub>, (C) DPAC-D-Py and (D) DPAC-D-PyPF<sub>6</sub>.

## Electrochemical Properties of the DPAC Derivatives

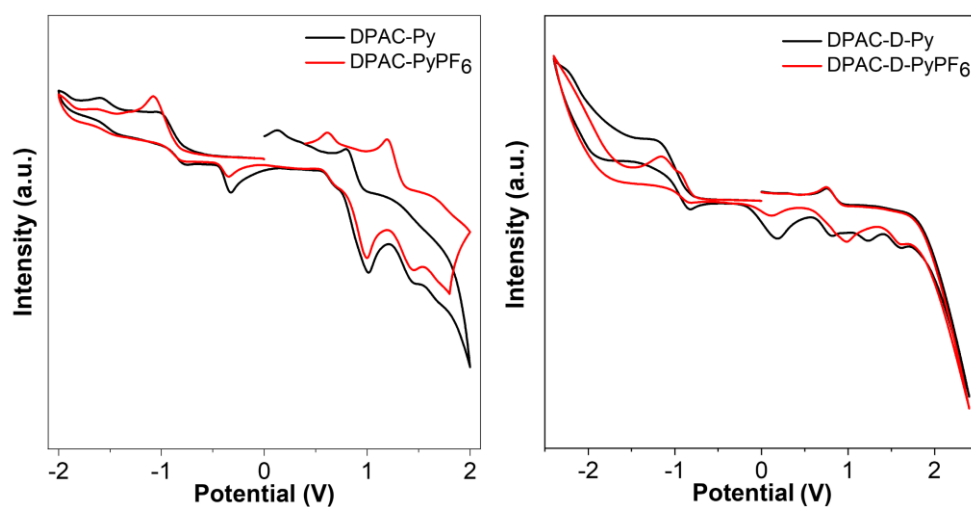

**Figure S26.** Cyclic voltammograms of DPAC-Py, DPAC-PyPF<sub>6</sub>, DPAC-D-Py and DPAC-D-PyPF<sub>6</sub> in THF. Electrolyte solution: tetrabutylammonium hexafluorophosphate, scan rate: 0.1 V/s.

## Theoretical Calculations of the DPAC Derivatives

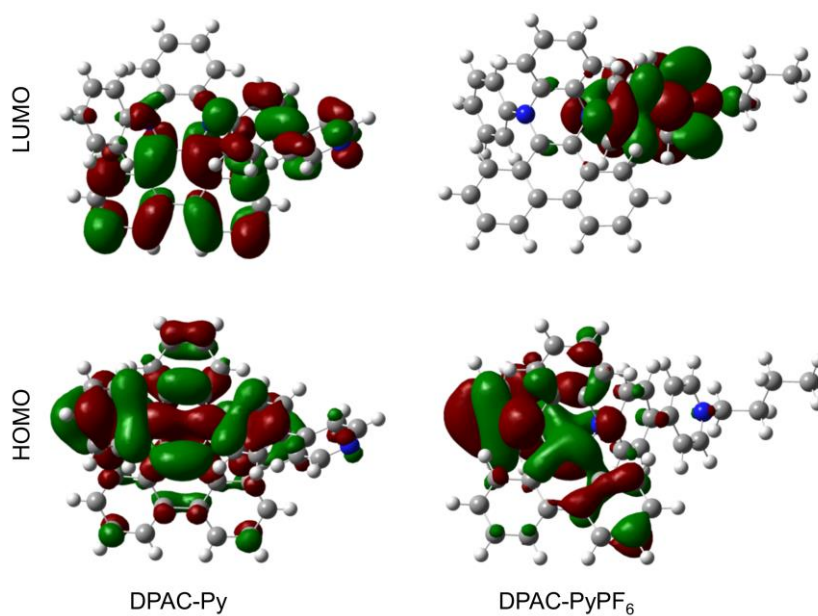

**Figure S27.** The HOMOs and LUMOs of DPAC-Py and DPAC-PyPF<sub>6</sub> calculated by DFT simulation based on the single-crystal structures.



## Photosensitizing Properties of the DPAC Derivatives

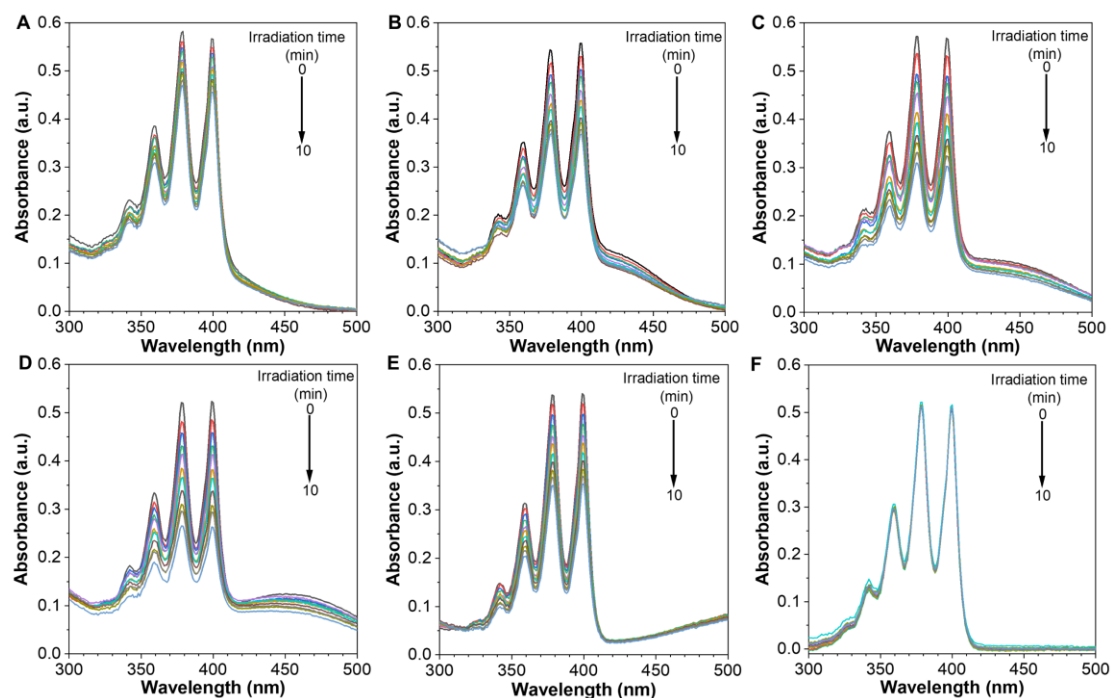

**Figure S28.** (A–E) Absorption spectra of (A) DPAC-Py, (B) DPAC-PyPF<sub>6</sub>, (C) DPAC-D-Py, (D) DPAC-D-PyPF<sub>6</sub>, (E) Rose Bengal in the presence of ABDA. (F) The absorption spectra of ABDA itself in aqueous solution (1 vol% DMSO) after being subjected to different time of white-light irradiation (10 mW/cm<sup>2</sup>). [DPAC-Py] = [DPAC-PyPF<sub>6</sub>] = [DPAC-D-Py] = [DPAC-D-PyPF<sub>6</sub>] = 10  $\mu$ M. [ABDA] = 50  $\mu$ M.

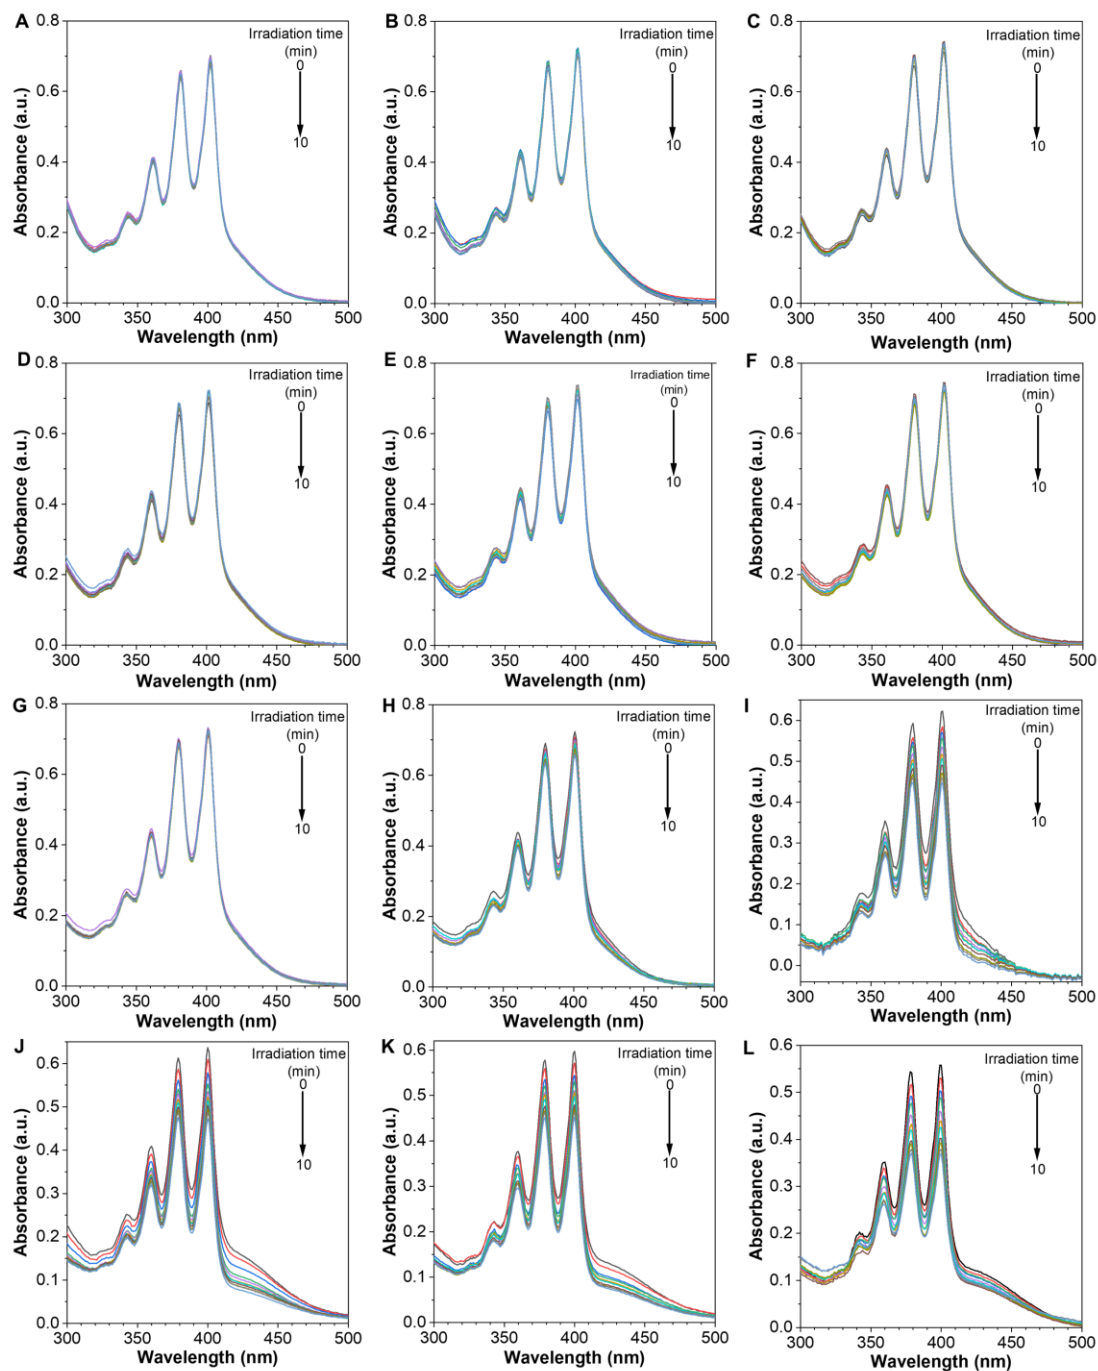

**Figure S29.** Absorption spectra of DPAC-PyPF<sub>6</sub> (10  $\mu$ M) with ABDA (50  $\mu$ M) in the mixtures of DMSO/water with different water fractions, (A) 0 vol%, (B) 10 vol%, (C) 20 vol%, (D) 30 vol%, (E) 40 vol%, (F) 50 vol%, (G) 60 vol%, (H) 70 vol%, (I) 80 vol%, (J) 90 vol%, (K) 95 vol%, (L) 99 vol% under white-light irradiation (10 mW/cm<sup>2</sup>) for different time.

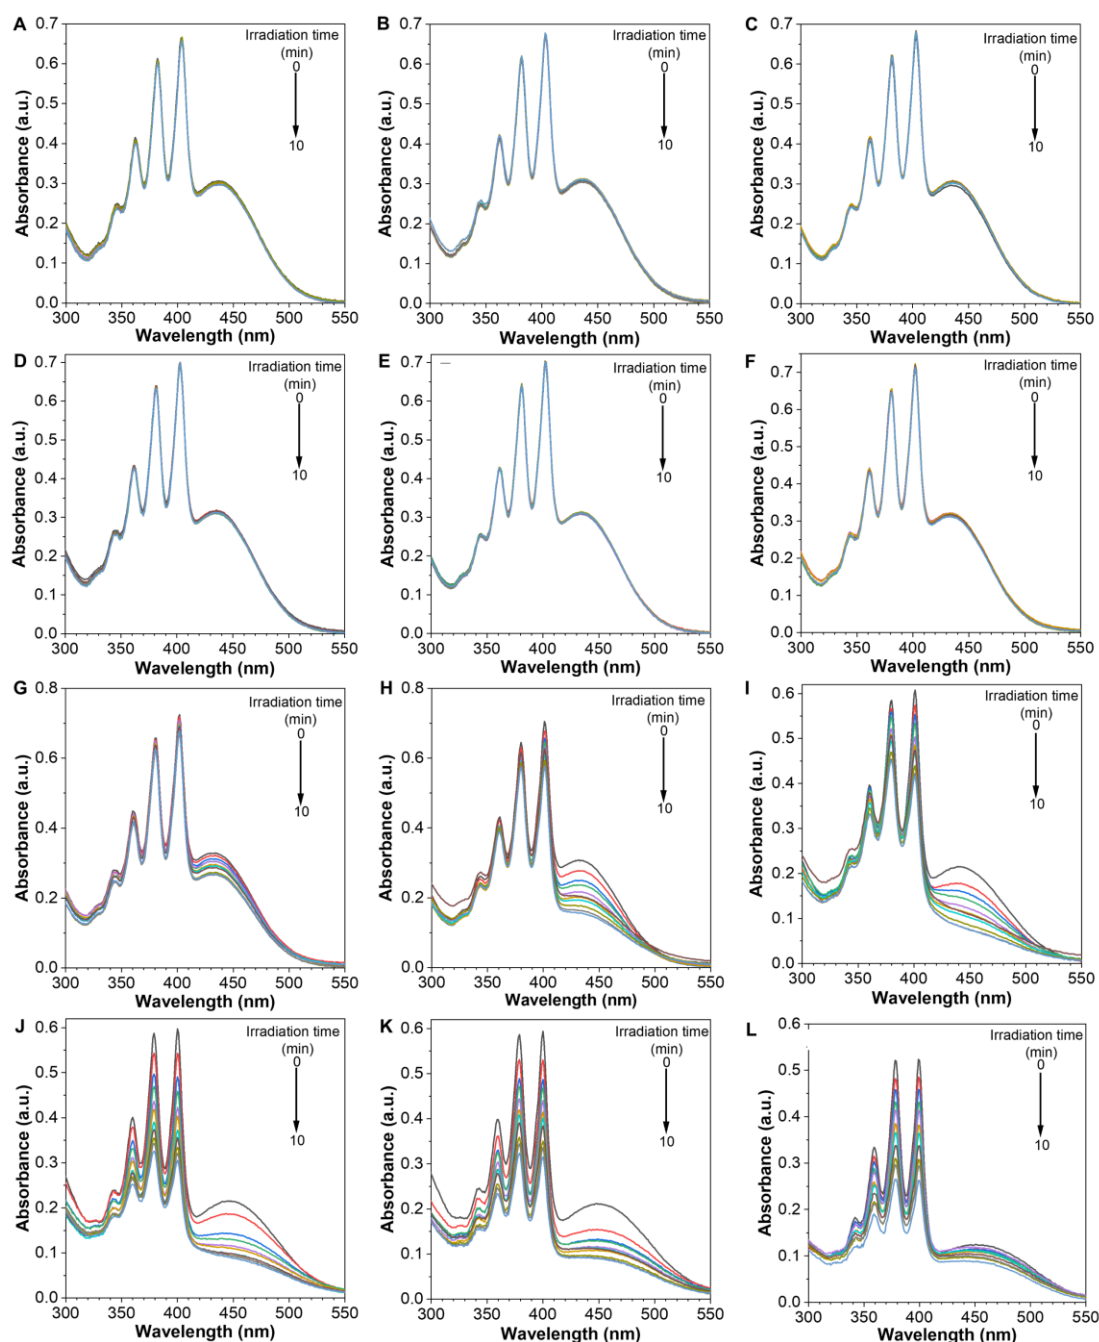

**Figure S30.** Absorption spectra of DPAC-D-PyPF<sub>6</sub> (10 μM) with ABDA (50 μM) in the mixtures of DMSO/water with different water fractions, (A) 0 vol%, (B) 10 vol%, (C) 20 vol%, (D) 30 vol%, (E) 40 vol%, (F) 50 vol%, (G) 60 vol%, (H) 70 vol%, (I) 80 vol%, (J) 90 vol%, (K) 95 vol%, (L) 99 vol% under white-light irradiation (10 mW/cm<sup>2</sup>) for different time.

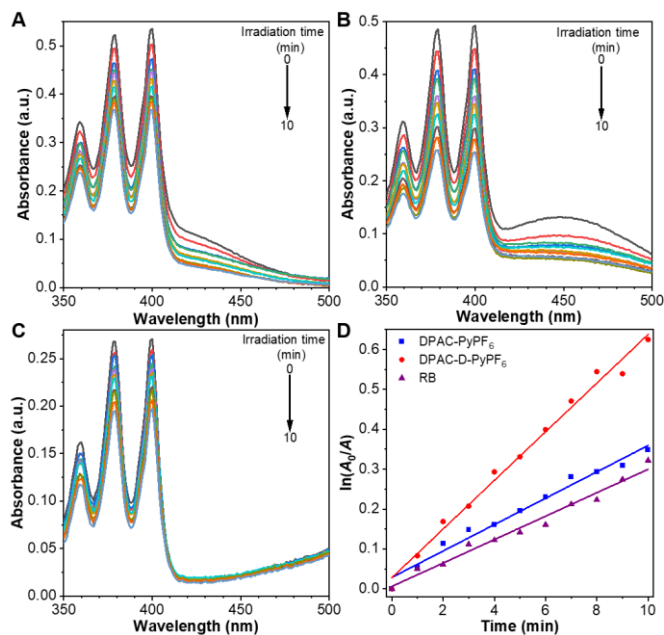

**Figure S31.** The UV-Vis spectra of ABDA in the presence of (A) DPAC-PyPF<sub>6</sub>, (B) DPAC-D-PyPF<sub>6</sub> and (C) RB in aqueous solution (1 vol% DMSO) after being subjected to different time of white-light irradiation (10 mW/cm<sup>2</sup>). (D) Time-dependent <sup>1</sup>O<sub>2</sub> generation kinetics deduced from the decomposition rates of ABDA in the presence of different PSs under white-light irradiation (10 mW/cm<sup>2</sup>) in aqueous solution (1 vol% DMSO).  $A_0$  = absorption of ABDA at 378 nm without light irradiation.  $A$  = real-time absorbance of ABDA at 378 nm at different irradiation time. [ABDA] = 5×[PS]. To avoid the inner-filter effect, the absorption maxima of the PSs were adjusted to about 0.2 OD, and the corresponding concentrations were applied for the measurements.

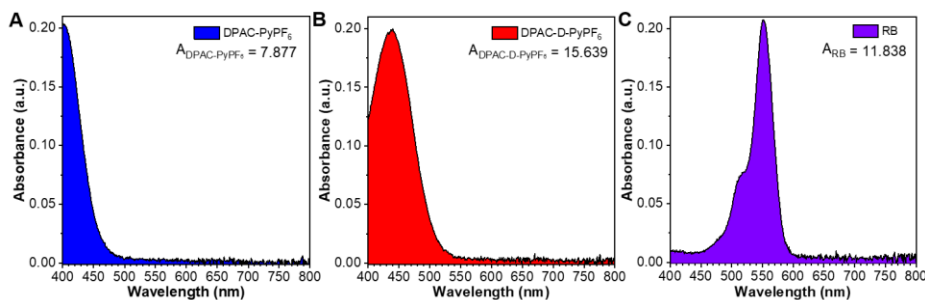

|                          | Slope   |                | Statistics    | <sup>1</sup> O <sub>2</sub> Quantum yield |
|--------------------------|---------|----------------|---------------|-------------------------------------------|
|                          | Value   | Standard Error | Adj. R-Square |                                           |
| RB                       | 0.03308 | 0.00161        | 0.9768        | 0.75                                      |
| DPAC-PyPF <sub>6</sub>   | 0.06100 | 0.00209        | 0.9884        | 1.27                                      |
| DPAC-D-PyPF <sub>6</sub> | 0.02938 | 0.00141        | 0.9773        | 1.18                                      |

**Figure S32.** The UV-Vis spectra of (A) DPAC-PyPF<sub>6</sub>, (B) DPAC-D-PyPF<sub>6</sub> and (C) Rose Bengal in the range of 400–800 nm. The table shows the optical parameters of these photosensitizers calculated according to  $\ln(A_0/A)$ .

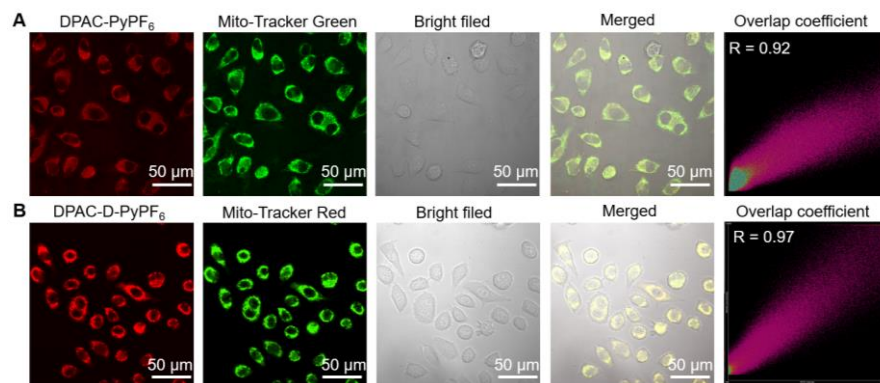

**Figure S33.** (A) Evaluation of the mitochondria-targeting ability of DPAC-PyPF<sub>6</sub> in HeLa cells.  $\lambda_{\text{ex, probe}} = 404 \text{ nm}$ ,  $\lambda_{\text{em, probe}} = 570\text{--}620 \text{ nm}$ ,  $\lambda_{\text{ex, Mito}} = 488 \text{ nm}$ ,  $\lambda_{\text{em, Mito}} = 500\text{--}549 \text{ nm}$ . (B) Evaluation of the mitochondria-targeting ability of DPAC-D-PyPF<sub>6</sub> in HeLa cells.  $\lambda_{\text{ex, probe}} = 404 \text{ nm}$ ,  $\lambda_{\text{em, probe}} = 650\text{--}700 \text{ nm}$ ,  $\lambda_{\text{ex, Mito}} = 561 \text{ nm}$ ,  $\lambda_{\text{em, Mito}} = 570\text{--}620 \text{ nm}$ . Scale bar: 10  $\mu\text{m}$ . [probe] = 5  $\mu\text{M}$ , [Mito-Tracker] = 250 nM, Scale bar: 50  $\mu\text{m}$ .

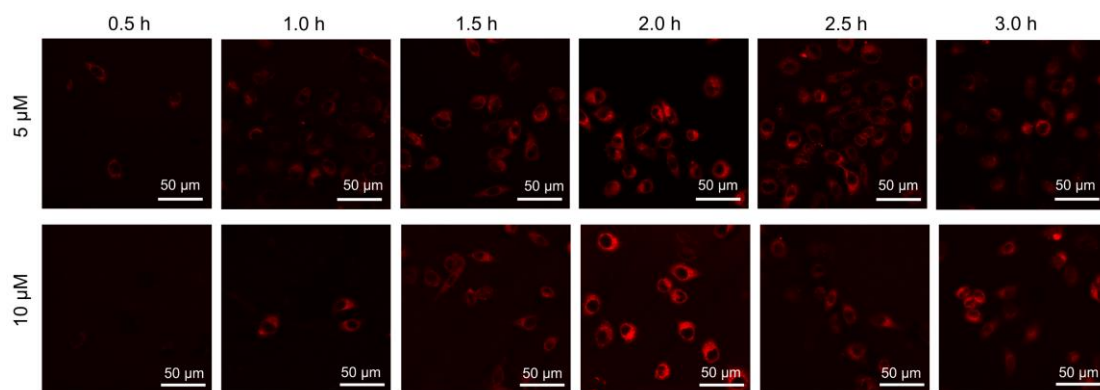

**Figure S34.** The CLSM of DPAC-PyPF<sub>6</sub> incubated with HeLa cells at 5  $\mu\text{M}$  or 10  $\mu\text{M}$  for different time. Scale bar: 50  $\mu\text{m}$ .

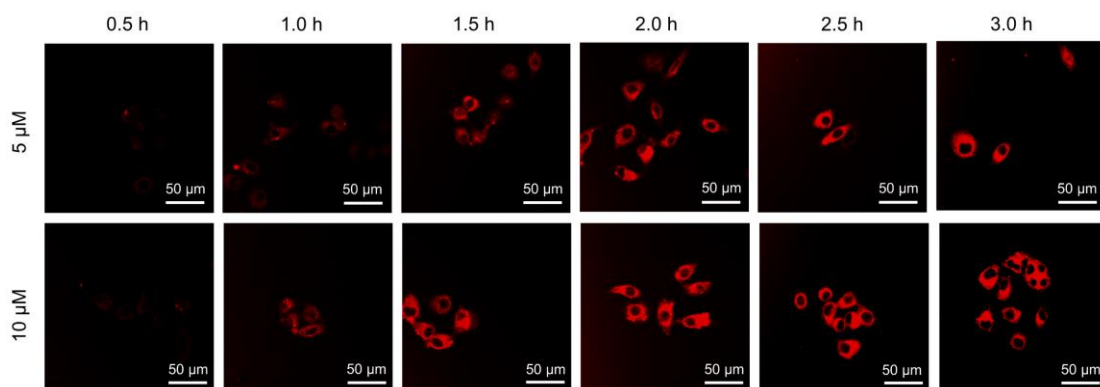

**Figure S35.** The CLSM of DPAC-D-PyPF<sub>6</sub> incubated with HeLa cells at 5  $\mu\text{M}$  or 10  $\mu\text{M}$  for different times. Scale bar: 50  $\mu\text{m}$ .
